# Supplementary material
Source: Springer Nature journal article supplement (https://www.springermedizin.de/resource/supplementary/12916_2010_362_MOESM4_ESM.pdf/9599796)

**Click  
for Audio**

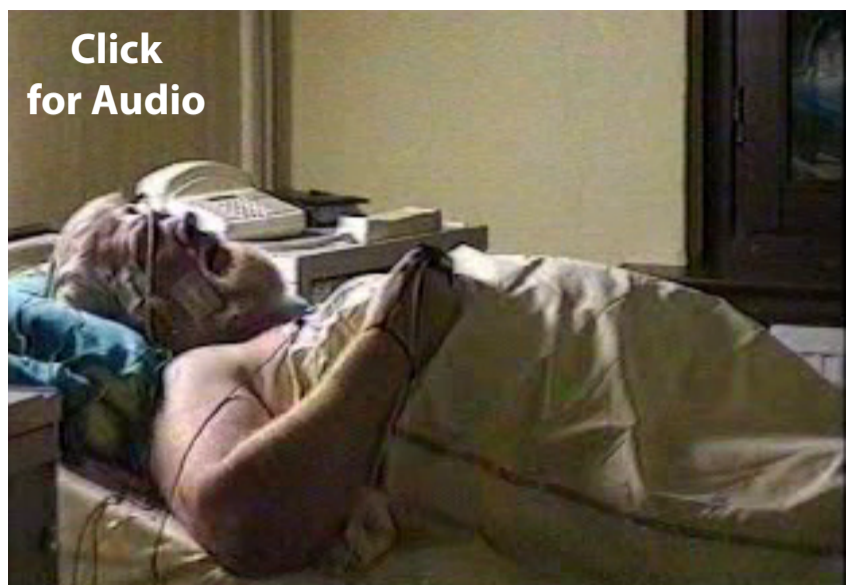

Supplement: MOESM4 [file 9599796]
